# Supplementary material for: Oxygen defect engineering in double perovskite oxides for effective water oxidation
Source: Royal Society of Chemistry journal article supplement (doi:10.1039/d0ta04362a), 2020-01-01
Supplement: d0ta04362a1.pdf [file d0ta04362a1.pdf]

## **Electronic Supporting Information**

# **Oxygen Defect Engineering in Double Perovskite oxides for Effective Water Oxidation**

Yunmin Zhu, Xiao Zhong, Shiguang Jin, Haijun Chen, Zuyun He, Qiuyu Liu and Yan Chen\*

School of Environment and Energy, State Key Laboratory of Pulp and Paper Engineering, South China University of Technology,

Guangzhou, Guangdong, 510006, China.

\*corresponding author: [escheny@scut.edu.cn](mailto:escheny@scut.edu.cn)

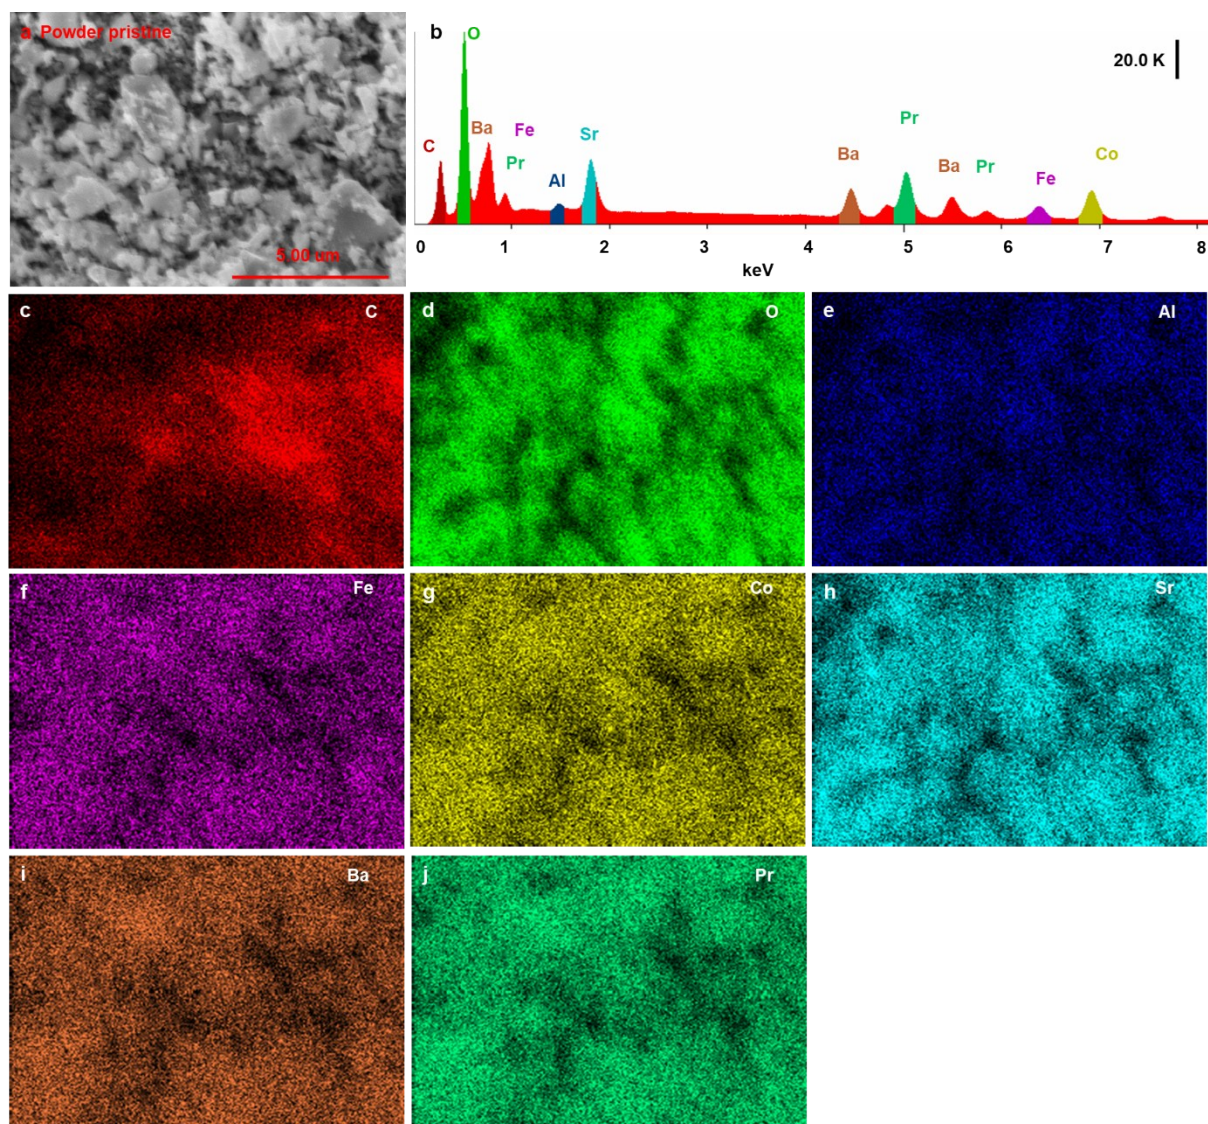

Fig. S1 (a) SEM image; (b) Elemental analysis of PBSCF powder; (c-j) EDS elemental mapping images of PBSCF obtained from the framed area shown in (a).

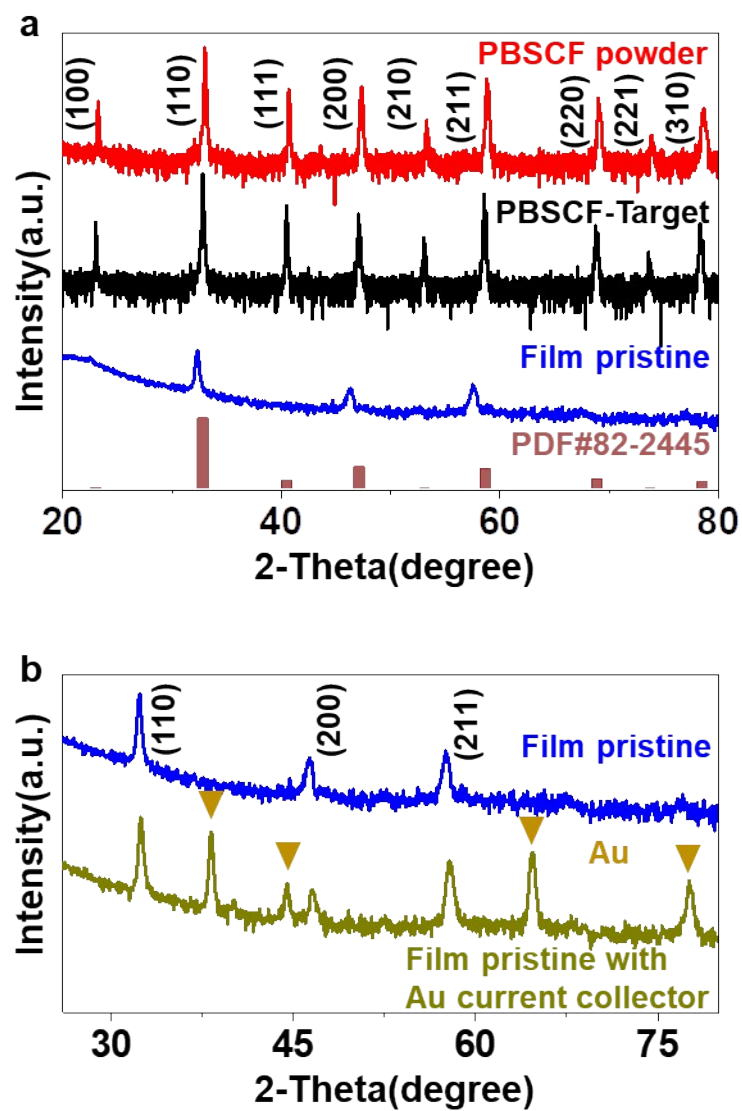

Fig. S2 (a) XRD patterns of PBSCF powder, PBSCF target and Film pristine; (b) XRD patterns of Film pristine with and without Au current collector.

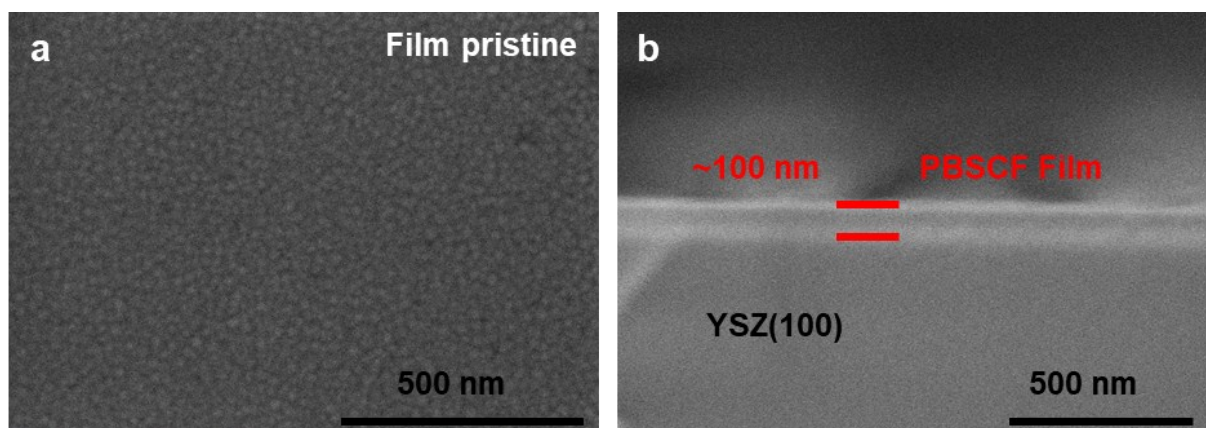

Fig. S3 SEM images of the (a) surface and (b) cross-section of Film pristine.

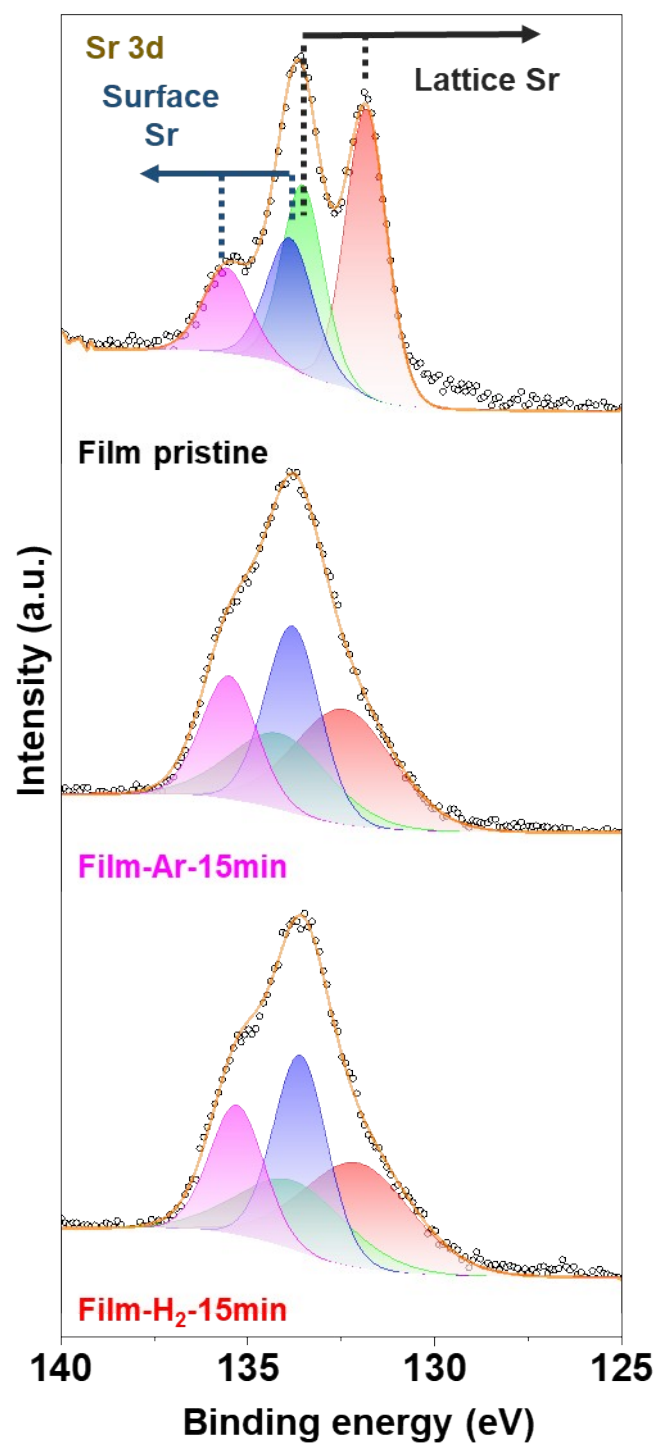

Fig. S4 Sr 3d XPS spectra of the Film pristine, Film-Ar-15min and Film-H<sub>2</sub>-15min.

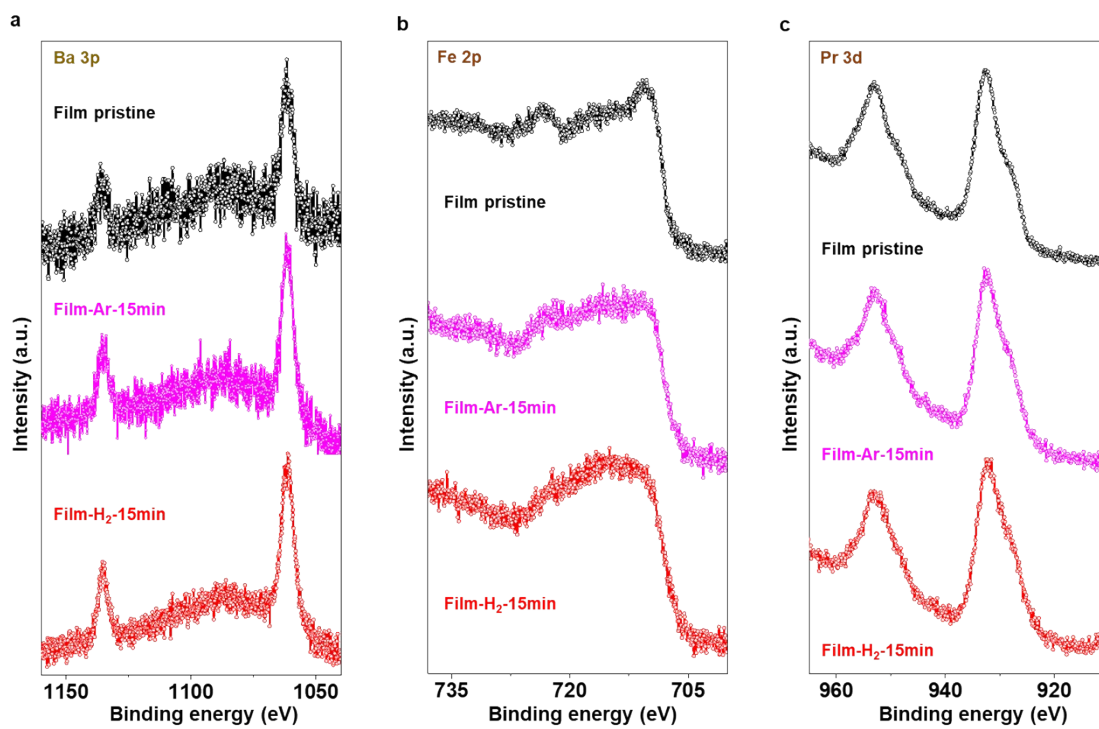

Fig. S5 (a) Ba 3p, (b) Fe 2p and (c) Pr 3d XPS spectra of the Film pristine, Film-Ar-15min and Film-H<sub>2</sub>-15min.

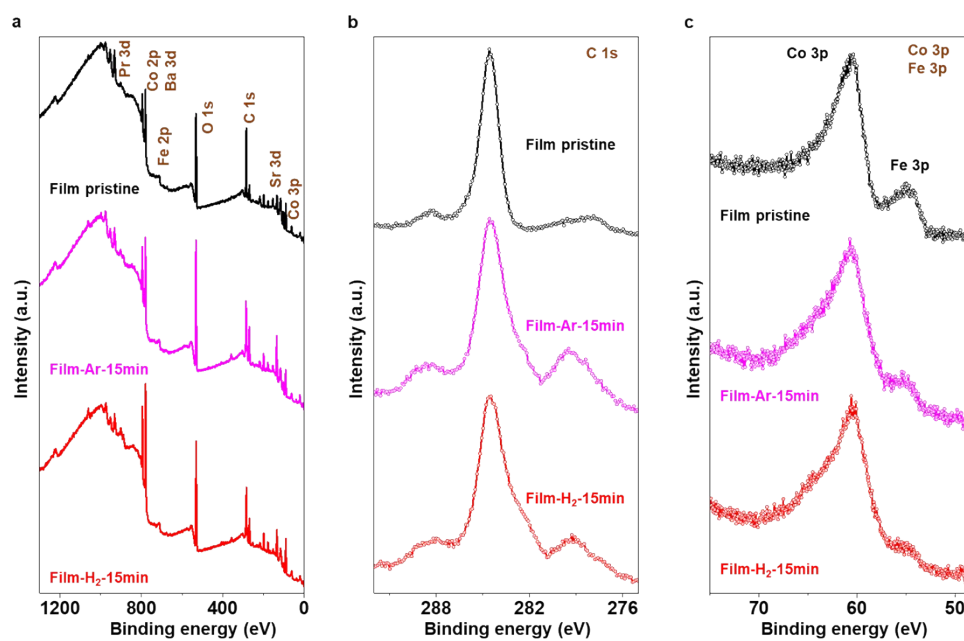

Fig. S6 (a) XPS survey spectra; (b) C 1s and (c) Co 3p/Fe 3p XPS spectra of the Film pristine, Film-Ar-15min and Film-H<sub>2</sub>-15min.



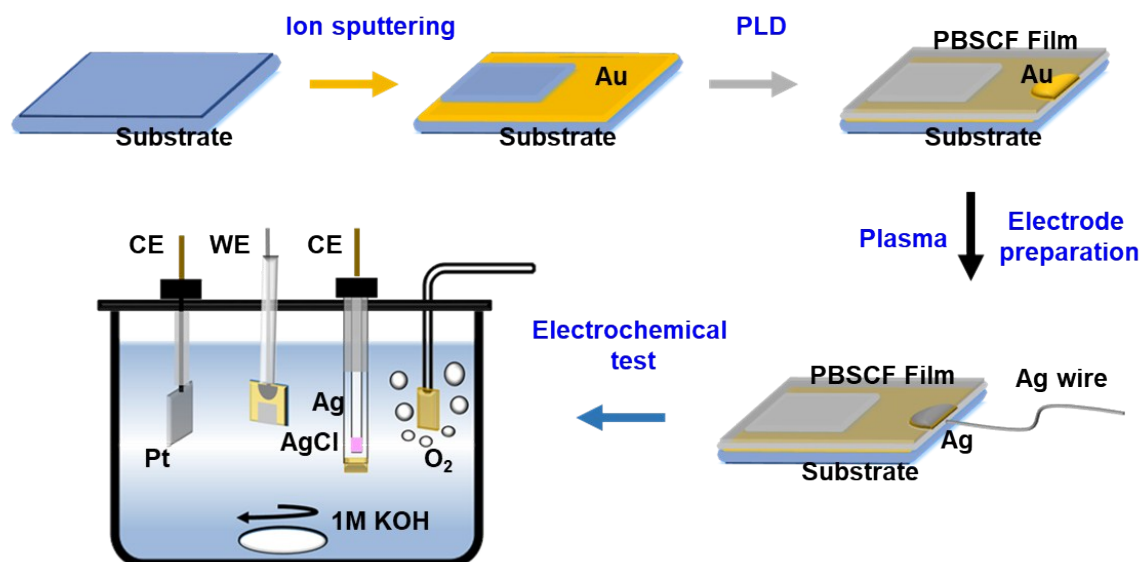

Fig. S7 Schematic illustration for the preparation and electrochemical test of thin film electrodes.



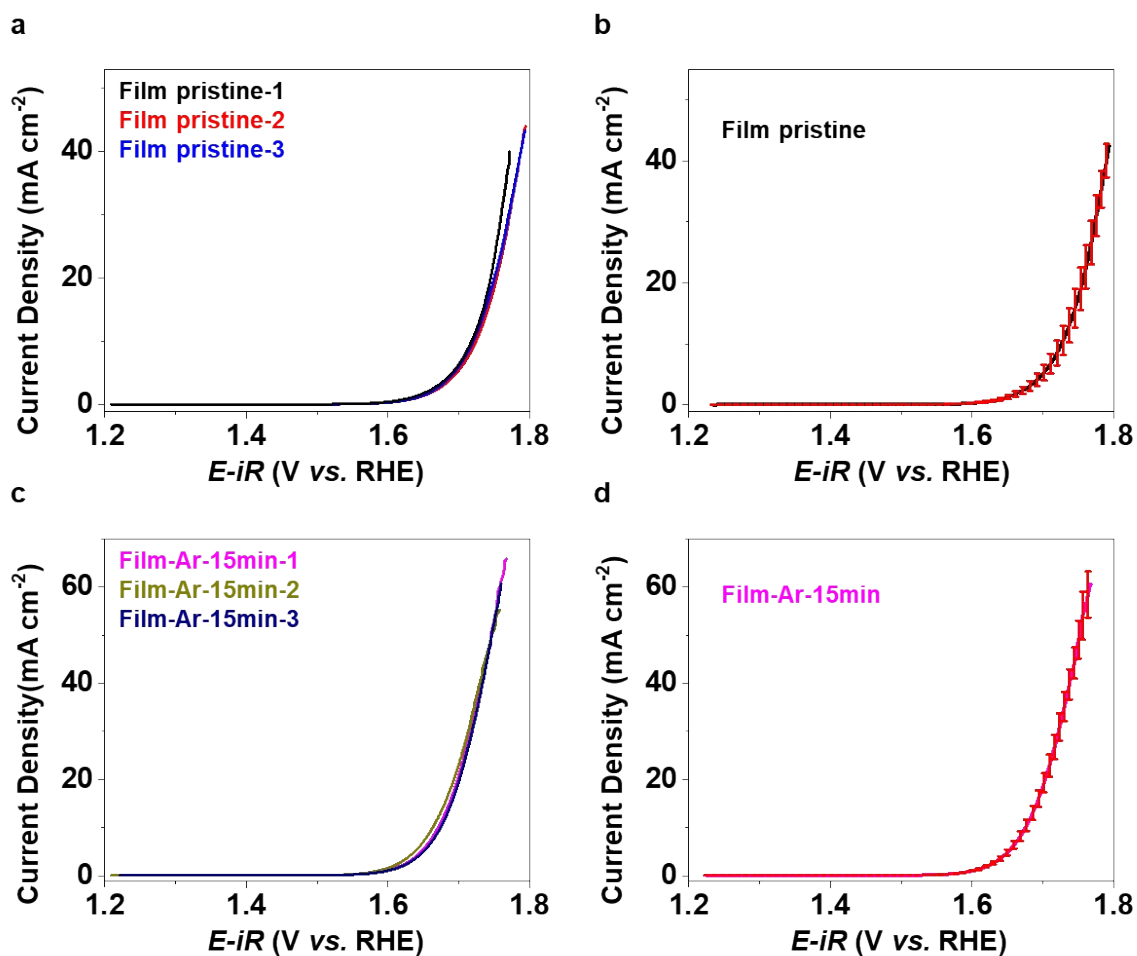

Fig. S8 Comparison of LSVs from independent tests for (a, b) pristine PBSCF thin film and (c, d) the ones subjected to  $\text{H}_2$  plasma treatment. While (a) and (c) show all the curves, (b) and (d) show the corresponding average curve with error bars.

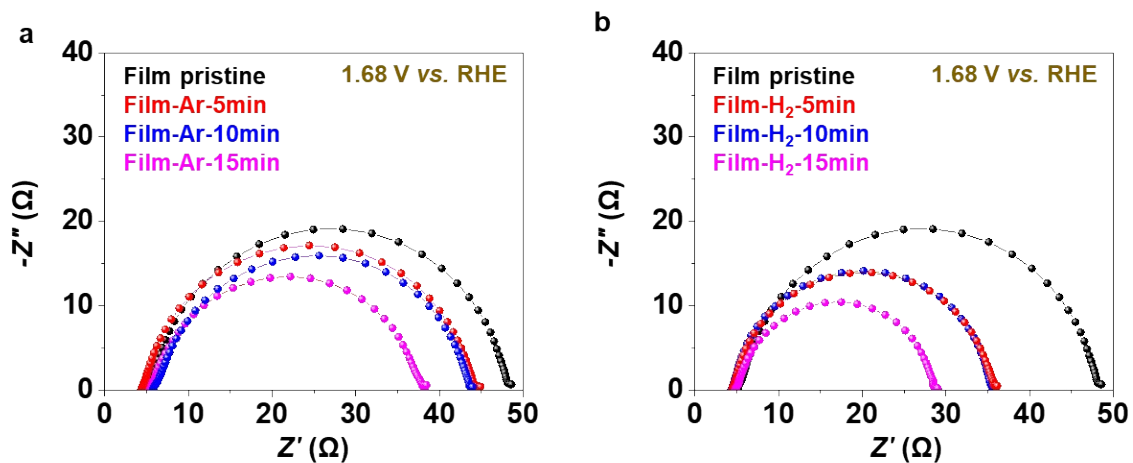

Fig. S9 Electrochemical impedance spectra of pristine film, film subjected to (a) Ar plasma treatment and (b) H<sub>2</sub> plasma treatment recorded at 1.68 V (versus RHE) in 1 M KOH.

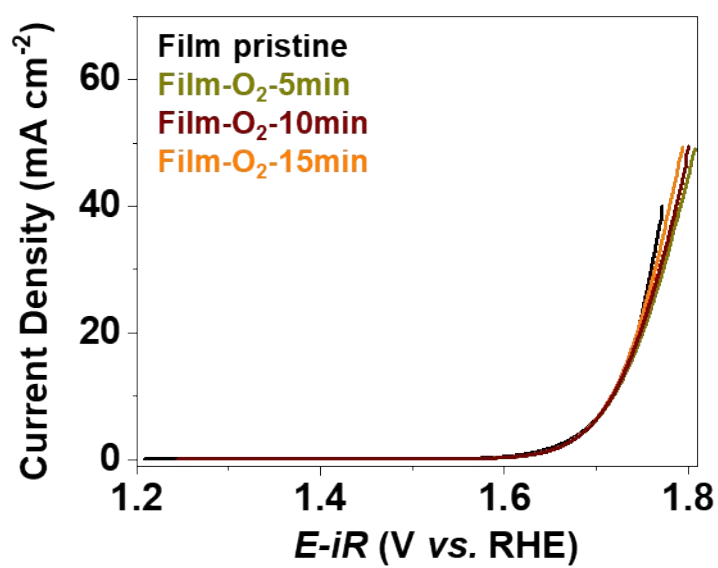

Fig. S10 LSV curves of OER for the pristine film (Film pristine), the films subjected to O<sub>2</sub> plasma treatment (Film-O<sub>2</sub>-xmin).

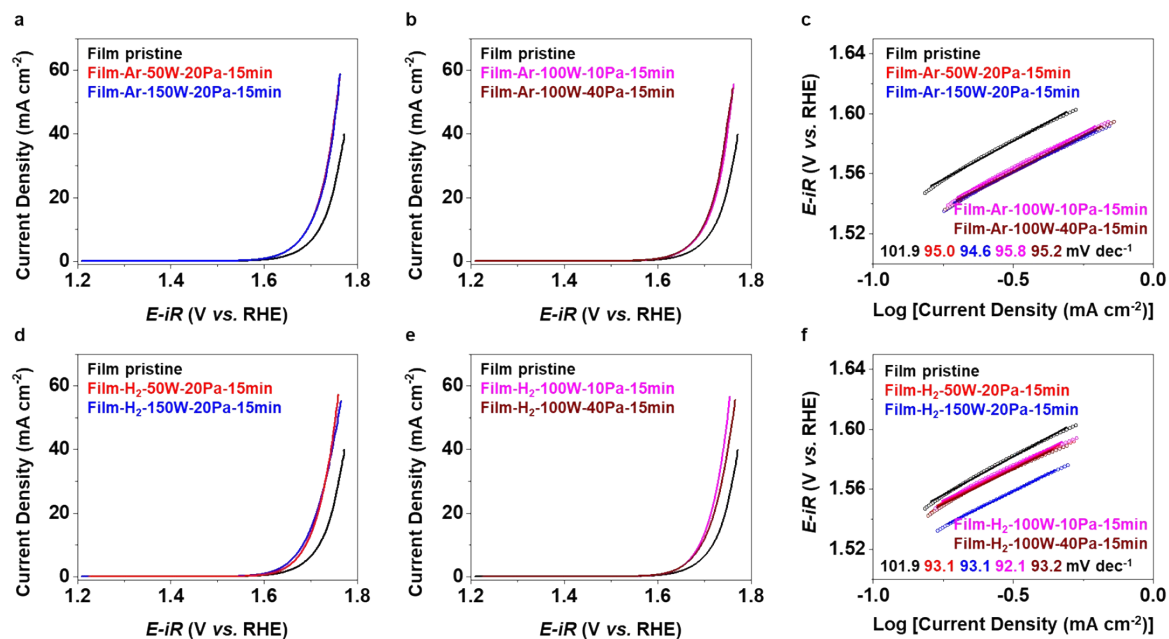

Fig. S11 (a) and (b) LSV curves; (c) Tafel plots of OER for the pristine film (Film pristine), the films subjected to Ar plasma treatment (Film-Ar-50/100/150W-10/20/40Pa-15min); (d) and (e) LSV curves; (f) Tafel plots of OER for the pristine film (Film pristine), the films subjected to H<sub>2</sub> plasma treatment (Film-H<sub>2</sub>-50/100/150W-10/20/40Pa-15min).

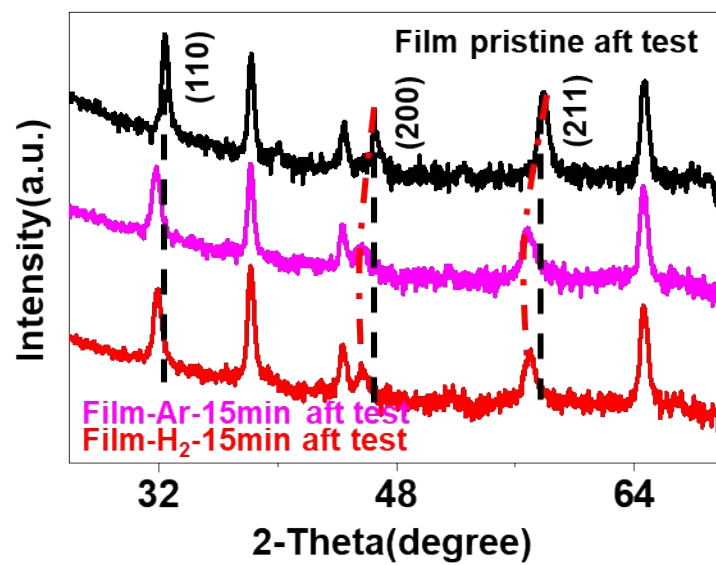

Fig. S12 XRD patterns of pristine film, Film-Ar-15min and Film-H<sub>2</sub>-15min after test.

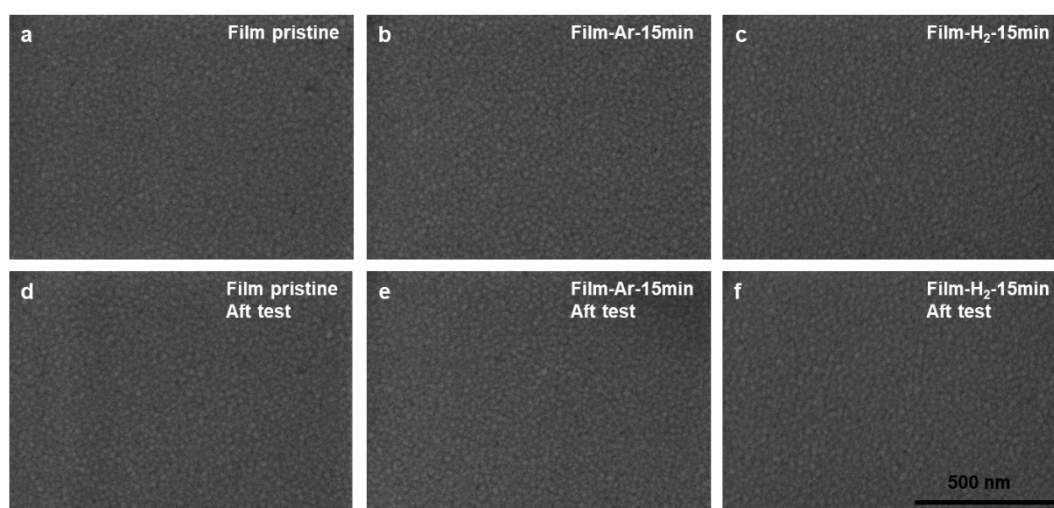

Fig. S13 SEM images of Film pristine, Film-Ar-15min and Film-H<sub>2</sub>-15min (a-c) before and (d-f) after test.

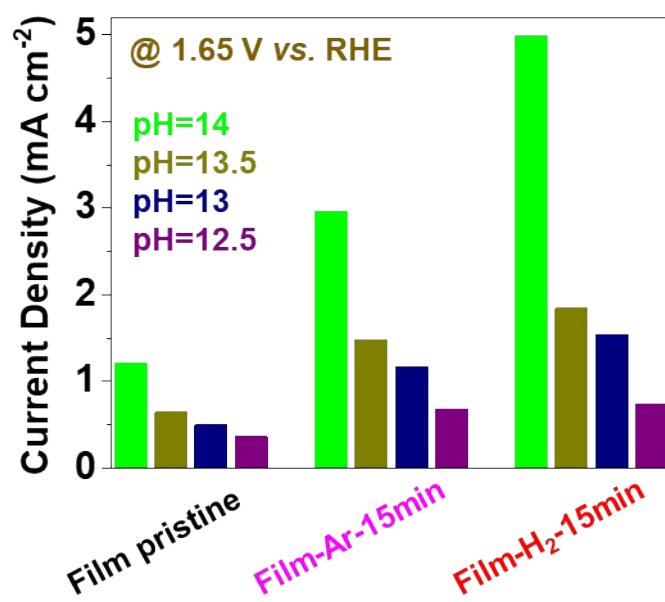

Figure S14 Current density of PBSCF thin film before and after to plasma treatment at 1.65 V (vs. RHE) in O<sub>2</sub>-saturated KOH with pH = 12.5 to 14.



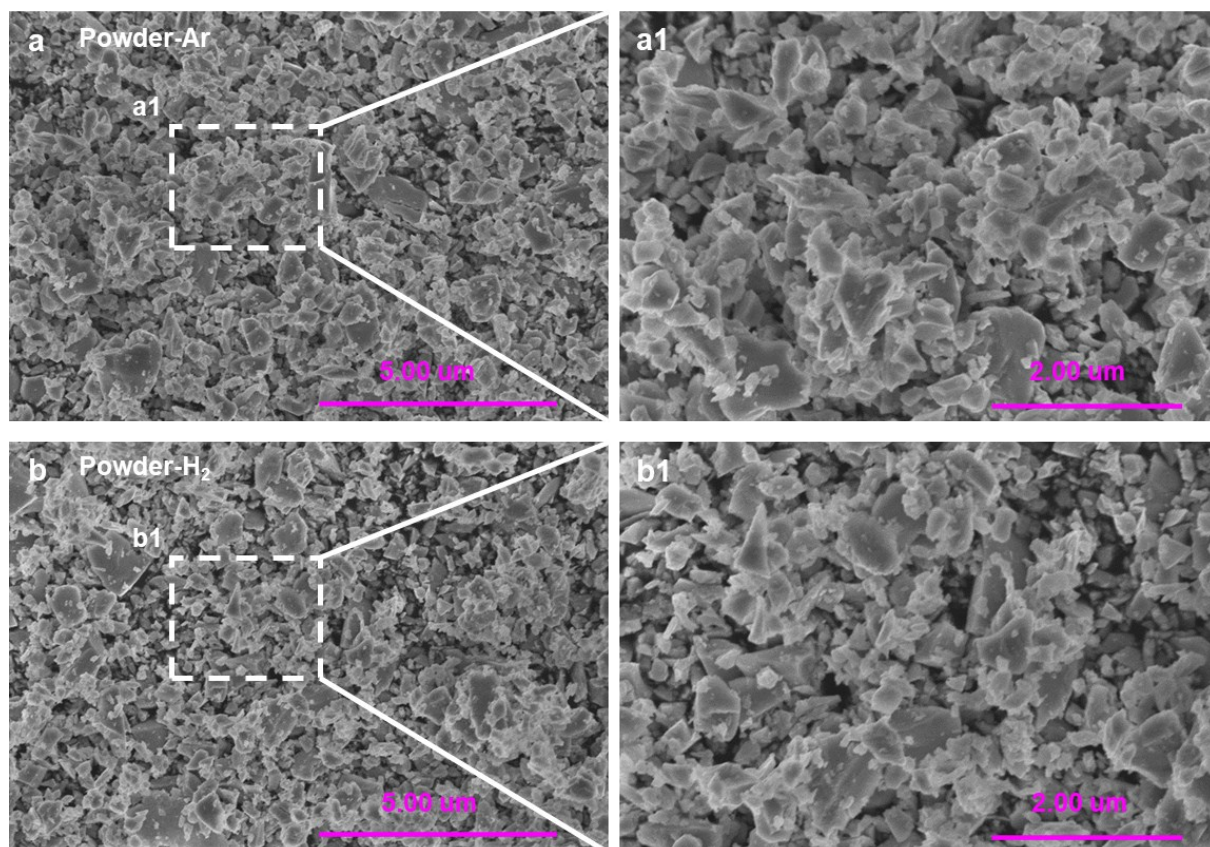

Fig. S15 SEM images of (a) and (a1) Powder-Ar and (b) and (b1) Powder-H<sub>2</sub>.

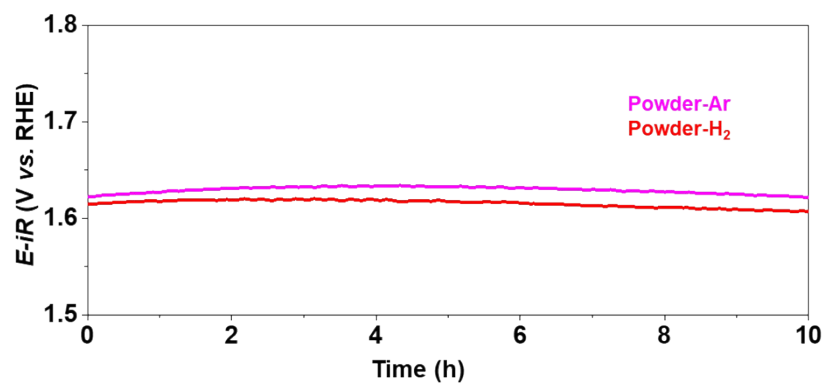

Fig. S16 Chronopotentiometric curves of the Powder-Ar and Powder-H<sub>2</sub> at 10 mA cm<sup>-2</sup>.

Table S1 Electrochemical impedance spectroscopy (EIS) fitting results for IrO<sub>2</sub>, Powder pristine, Powder-Ar and Powder-H<sub>2</sub>.

| Catalyst              | Potential (vs. RHE) | R <sub>s</sub> (Ω) | R <sub>ct</sub> (Ω) |
|-----------------------|---------------------|--------------------|---------------------|
| IrO <sub>2</sub>      | 1.57                | 6.2                | 51.1                |
| IrO <sub>2</sub>      | 1.62                | 6.3                | 32                  |
| IrO <sub>2</sub>      | 1.67                | 6.5                | 28.7                |
| Powder pristine       | 1.57                | 5.9                | 131.7               |
| Powder pristine       | 1.62                | 6.0                | 44.1                |
| Powder pristine       | 1.67                | 6.2                | 22                  |
| Powder-Ar             | 1.57                | 6.1                | 106.7               |
| Powder-Ar             | 1.62                | 6.1                | 33                  |
| Powder-Ar             | 1.67                | 6.1                | 17.2                |
| Powder-H <sub>2</sub> | 1.57                | 6.1                | 85.1                |
| Powder-H <sub>2</sub> | 1.62                | 6.1                | 25.8                |
| Powder-H <sub>2</sub> | 1.67                | 6.1                | 12.8                |
